# Supplementary material for: Influence of Vineyard Inter-Row Management on Grapevine Leafhoppers and Their Natural Enemies
Source: MDPI journal article supplement (doi:10.3390/insects15050355), 2024-05-14
Supplement: s1 [file s1]

## Supplementary Materials

**Table S1.** Herbaceous plants recorded from May to August (2013–2015) in the study-vineyard plots belonging to alternate mowing treatment (AM). Classes of the inter-row coverage for each species: r = rare, less than 1.0%; 1 = 1.1–10.0%; 2 = 10.1–20.0%; and 3 = 20.1–40.0%. Labels in bold indicate plants in the flowering stage at the sampling moment.

| Family          | Species                                       | May      | June     | Early July | Late July | August   |
|-----------------|-----------------------------------------------|----------|----------|------------|-----------|----------|
| Amaranthaceae   | <i>Amaranthus deflexus</i> L.                 |          |          |            | r         |          |
| Amaranthaceae   | <i>Amaranthus retroflexus</i> L.              |          |          |            |           | <b>1</b> |
| Amaranthaceae   | <i>Chenopodium album</i> L.                   |          |          |            | r         |          |
| Apiaceae        | <i>Daucus carota</i> L.                       | 2        | 1        | 2          |           |          |
| Apiaceae        | <i>Pastinaca sativa</i> L.                    |          |          |            | 2         |          |
| Asteraceae      | <i>Ambrosia artemisiifolia</i> L.             |          |          |            |           | 1        |
| Asteraceae      | <i>Artemisia vulgaris</i> L.                  |          | 2        | 1          | 2         | 1        |
| Asteraceae      | <i>Cirsium arvense</i> (L.) Scop.             |          | 1        | r          |           |          |
| Asteraceae      | <i>Crepis biennis</i> L.                      | <b>r</b> | <b>1</b> | <b>1</b>   | 1         | <b>r</b> |
| Asteraceae      | <i>Erigeron annuus</i> (L.)                   |          | 2        | 1          | 1         | <b>1</b> |
| Asteraceae      | <i>Erigeron canadensis</i> L.                 | <b>2</b> | 1        | r          | 1         | 1        |
| Asteraceae      | <i>Helminthotheca echinoides</i> (L.) Holub   |          |          |            | 1         | <b>r</b> |
| Asteraceae      | <i>Lactuca sativa</i> L.                      |          |          | r          |           |          |
| Asteraceae      | <i>Matricaria chamomilla</i> L.               | <b>r</b> |          |            |           |          |
| Asteraceae      | <i>Taraxacum</i> sect. <i>Taraxacum</i>       | <b>r</b> |          | r          |           | <b>r</b> |
| Brassicaceae    | <i>Descurainia sophia</i> (L.) Webb ex Prantl |          |          |            | r         |          |
| Caprifoliaceae  | <i>Valerianella locusta</i> L. (Laterr.)      | <b>r</b> | <b>r</b> |            |           |          |
| Caryophyllaceae | <i>Silene vulgaris</i> (Moench) Garcke        |          |          | r          |           | 1        |
| Caryophyllaceae | <i>Stellaria media</i> (L.) Vill.             | <b>1</b> |          |            |           |          |
| Convolvulaceae  | <i>Convolvulus arvensis</i> L.                | <b>r</b> | r        | <b>1</b>   |           | <b>1</b> |
| Equisetaceae    | <i>Equisetum</i> sp.                          |          | r        |            |           |          |
| Euphorbiaceae   | <i>Euphorbia verrucosa</i> L.                 | <b>r</b> | r        |            |           |          |
| Fabaceae        | <i>Trifolium campestre</i> Cchreb.            |          | <b>1</b> | r          |           | <b>r</b> |
| Fabaceae        | <i>Trifolium pratense</i> L.                  | <b>r</b> | r        | <b>r</b>   |           | <b>r</b> |
| Fabaceae        | <i>Trifolium repens</i> L.                    | <b>1</b> | <b>1</b> | 2          |           | <b>1</b> |
| Fabaceae        | <i>Vicia cracca</i> L.                        | <b>r</b> | r        |            |           |          |
| Geraniaceae     | <i>Erodium cicutarium</i> (L.) L'Hér.         | <b>1</b> | r        |            |           |          |
| Geraniaceae     | <i>Geranium molle</i> L.                      | <b>r</b> | <b>r</b> | <b>r</b>   |           |          |
| Hypericaceae    | <i>Hypericum perforatum</i> L.                |          |          | r          |           | r        |
| Lamiaceae       | <i>Lamium purpureum</i> L.                    | <b>r</b> |          |            |           |          |

|                |                                         |   |     |     |
|----------------|-----------------------------------------|---|-----|-----|
| Lamiaceae      | <i>Mentha longifolia</i> (L.) L.        | 1 | 1   | 1   |
| Papaveraceae   | <i>Papaver rhoeas</i> L.                | 1 |     |     |
| Plantaginaceae | <i>Plantago lanceolata</i> L.           |   | 1   | r   |
| Plantaginaceae | <i>Plantago major</i> L.                | r | r   | 1 r |
| Plantaginaceae | <i>Plantago media</i> L.                |   |     | 1 1 |
| Plantaginaceae | <i>Veronica persica</i> Poir.           | 1 | r   |     |
| Poaceae        | <i>Cynodon dactylon</i> (L.) Pers.      |   | 2   | 1 2 |
| Poaceae        | <i>Dactylis glomerata</i> L.            | r | 1 1 |     |
| Poaceae        | <i>Digitaria sanguinalis</i> (L.) Scop. |   | 1   |     |
| Poaceae        | <i>Hordeum murinum</i> L.               | 3 | 1   | r   |
| Poaceae        | <i>Lolium multiflorum</i> Lam.          |   |     | 1   |
| Poaceae        | <i>Lolium pratense</i> (Huds.) Darbysh. |   | 1   |     |
| Poaceae        | <i>Poa annua</i> L.                     |   |     | r 2 |
| Poaceae        | <i>Poa pratensis</i> L.                 |   |     | 1   |
| Poaceae        | <i>Setaria italica</i> (L.) P.Beauv.    |   | 1 r | 3 3 |
| Polygonaceae   | <i>Polygonum aviculare</i> L.           |   |     | 1   |
| Portulacaceae  | <i>Portulaca oleracea</i> L.            |   |     | 1 1 |
| Ranunculaceae  | <i>Delphinium consolida</i> L.          | r |     |     |
| Ranunculaceae  | <i>Fumaria officinalis</i> L.           |   | 3   |     |
| Solanaceae     | <i>Solanum nigrum</i> L.                |   |     | 1   |
| Urticaceae     | <i>Urtica dioica</i> L.                 | r |     |     |
| Violaceae      | <i>Viola arvensis</i> Murray            | r |     |     |

**Table S2.** Average monthly temperatures and monthly precipitation from May to September (2013–2015) obtained from a weather station (Gradisca d’Isonzo, Gorizia, ARPA FVG–OSMER, <http://www.meteo.fvg.it/>) located at 6 km from the study vineyard.

| Month     | Average temperature (°C) |      |      |      | Rainfall (mm) |      |      |     |
|-----------|--------------------------|------|------|------|---------------|------|------|-----|
|           | 2013                     | 2014 | 2015 | *    | 2013          | 2014 | 2015 | *   |
| May       | 16.3                     | 17.2 | 19.0 | 17.7 | 343           | 93   | 80   | 112 |
| June      | 21.5                     | 21.7 | 22.8 | 21.6 | 76            | 122  | 110  | 105 |
| July      | 25.9                     | 22.2 | 26.5 | 23.7 | 28            | 182  | 88   | 94  |
| August    | 24.3                     | 22.0 | 24.9 | 23.6 | 73            | 124  | 182  | 102 |
| September | 19.3                     | 18.5 | 19.7 | 18.9 | 204           | 112  | 162  | 172 |

\* Mean value over a period (1990–2020)

**Table S3.** Spiders collected with the drop-cloth method on grapevine canopy during three years in the study vineyard. NI = not identified to genus and species level.

| Family               | Taxon                                       | Hunting strategy | Total spiders |
|----------------------|---------------------------------------------|------------------|---------------|
| Araneidae            | <i>Araneus</i> sp.                          | web-builder      | 48            |
| Araneidae            | Araneidae NI                                | web-builder      | 3             |
| Araneidae            | <i>Mangora acalypha</i> (Walckenaer)        | web-builder      | 138           |
| Araneidae            | <i>Nuctenea umbricata</i> (Clerck)          | web-builder      | 18            |
| Clubionidae          | <i>Clubiona</i> sp.                         | hunter           | 1             |
| Gnaphosidae          | <i>Drassodes</i> sp.                        | hunter           | 76            |
| Gnaphosidae          | <i>Micaria</i> sp.                          | hunter           | 6             |
| Linyphiidae          | <i>Lyniphia triangularis</i> (Clerck)       | web-builder      | 7             |
| Linyphiidae          | Erigoninae NI                               | web-builder      | 61            |
| Lycosidae            | <i>Arctosa</i> sp.                          | hunter           | 6             |
| Oxyopidae            | <i>Oxyopes lineatus</i> Latreille           | hunter           | 1112          |
| Oxyopidae            | <i>Oxyopes ramosum</i> Martini & Goeze      | hunter           | 48            |
| Philodromidae        | <i>Philodromus aureoles</i> (Clerck)        | hunter           | 14            |
| Philodromidae        | <i>Tibellus oblungus</i> (Walckenaer)       | hunter           | 3             |
| Pisauridae           | <i>Pisaura</i> sp.                          | hunter           | 22            |
| Salticidae           | <i>Heliophanus</i> sp.                      | hunter           | 35            |
| Salticidae           | <i>Leptorchester berolinensis</i> C.L. Koch | hunter           | 8             |
| Salticidae           | <i>Philaeus chrysops</i> (Poda)             | hunter           | 4             |
| Salticidae           | <i>Pseudicius encarpatus</i> (Walckenaer)   | hunter           | 13            |
| Salticidae           | <i>Salticus</i> sp.                         | hunter           | 8             |
| Salticidae           | Salticidae NI                               | hunter           | 8             |
| Sparassidae          | <i>Micrommata virescens</i> (Clerck)        | hunter           | 65            |
| Theridiidae          | <i>Episinus truncatus</i> Latreille         | web-builder      | 1             |
| Theridiidae          | <i>Theridion</i> sp.                        | web-builder      | 20            |
| Theridiidae          | <i>Theridula gonyogaster</i> (Simon)        | web-builder      | 2             |
| Theridiidae          | Theridiidae NI                              | web-builder      | 6             |
| Thomisidae           | <i>Runcinia grammica</i> (C.L. Koch)        | hunter           | 39            |
| Thomisidae           | <i>Synema globosum</i> (Fabricius)          | hunter           | 18            |
| Thomisidae           | <i>Thomisus onustus</i> Walckenaer          | hunter           | 3             |
| Thomisidae           | <i>Xysticus</i> sp.                         | hunter           | 177           |
| Uloboridae           | <i>Uloborus walckenaerius</i> L.            | web-builder      | 10            |
| <b>Total spiders</b> |                                             |                  | <b>1980</b>   |

14  
15
